# Supplementary material for: Discrete and polymeric complexes of a macrocyclic pillar ligand in the absence and presence of dicarboxylic acid coligands
Source: Royal Society of Chemistry journal article supplement (doi:10.1039/c5ce01127b), 2015-01-01
Supplement: c5ce01127b1.pdf [file c5ce01127b1.pdf]

## Electronic Supplementary Information

For

### **Discrete and polymeric complexes of a macrocyclic pillar ligand in the absence and presence of dicarboxylic acid coligands**

Hyunsoo Ryu,<sup>a</sup> Yanyan Mulyana,<sup>b</sup> In-Hyeok Park,<sup>a</sup> Jinhee Kim,<sup>a</sup> Leonard F. Lindoy\*<sup>b</sup> and Shim Sung Lee\*<sup>a</sup>

<sup>a</sup>*Department of Chemistry and Research Institute of Natural Science, Gyeongsang National University, Jinju 660-701, S. Korea*

<sup>b</sup>*School of Chemistry, F11, The University of Sydney, Sydney 2006, NSW, Australia*

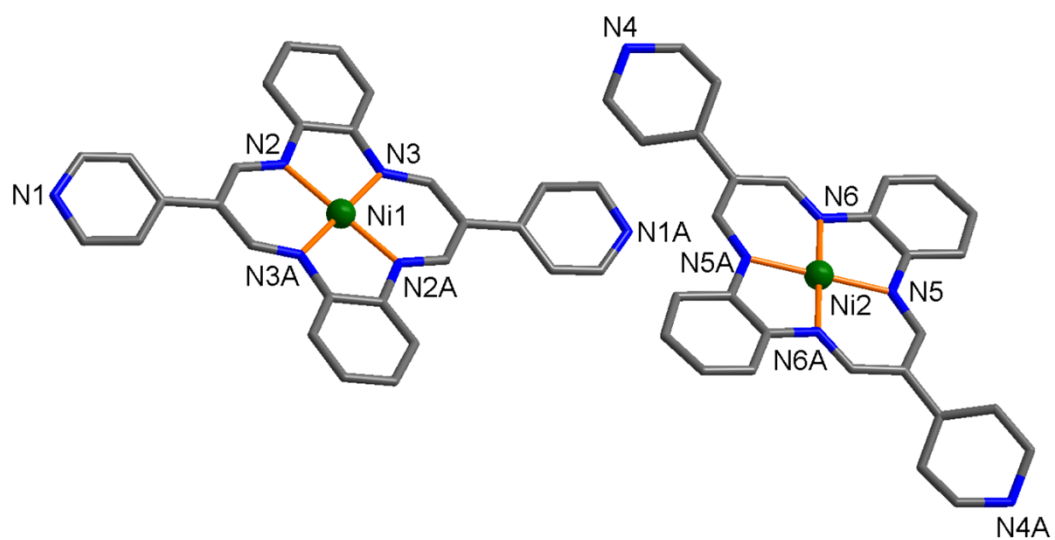

**Fig. S1** Crystal structure of **1**.

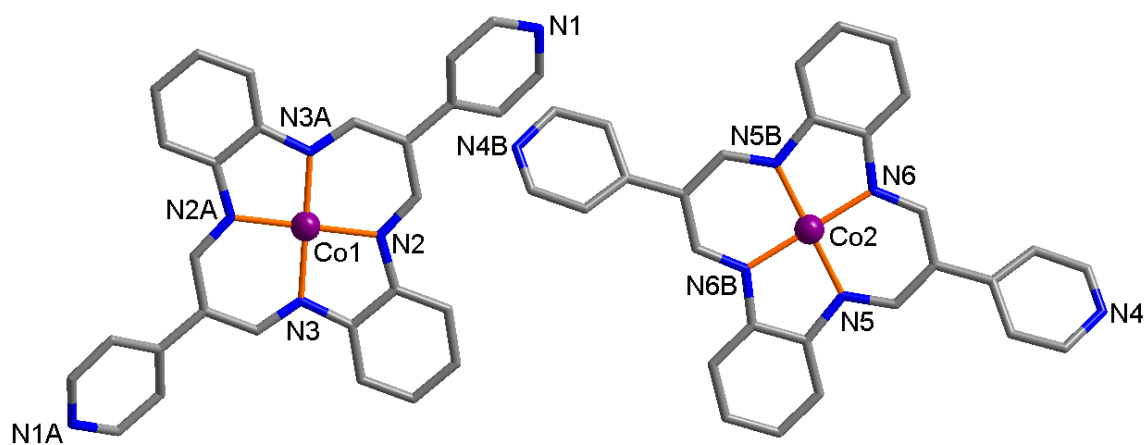

**Fig. S2** Crystal structure of **2**.

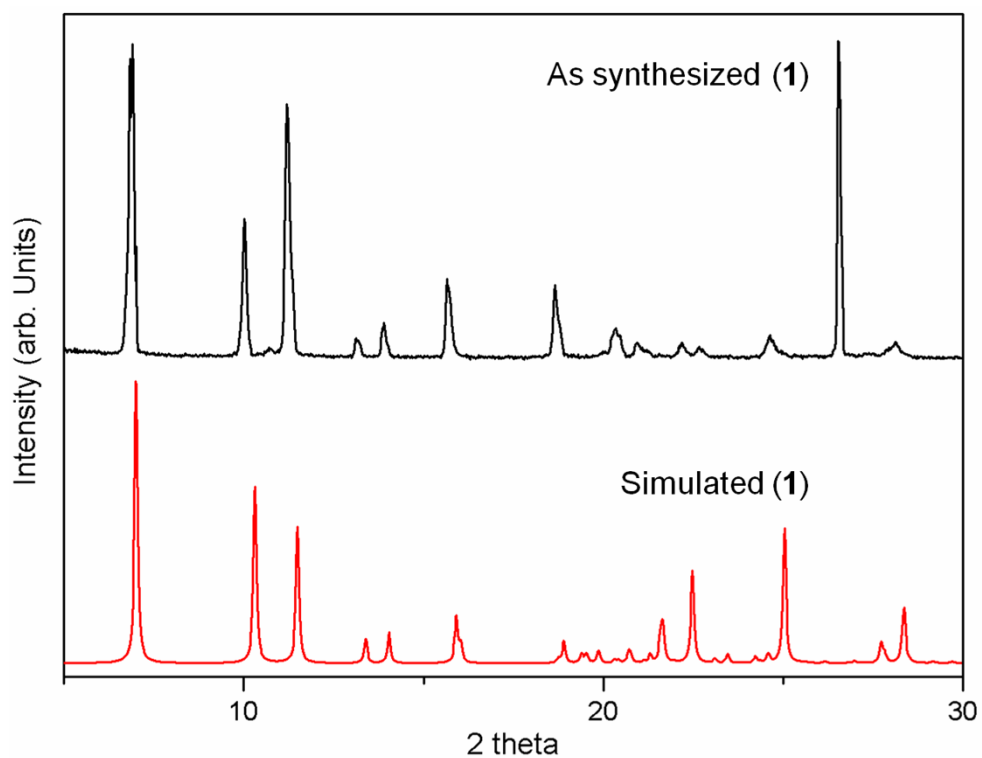

**Fig. S3** PXRD patterns for **1**: (top) as synthesized and (bottom) simulated from the single-crystal X-ray data.

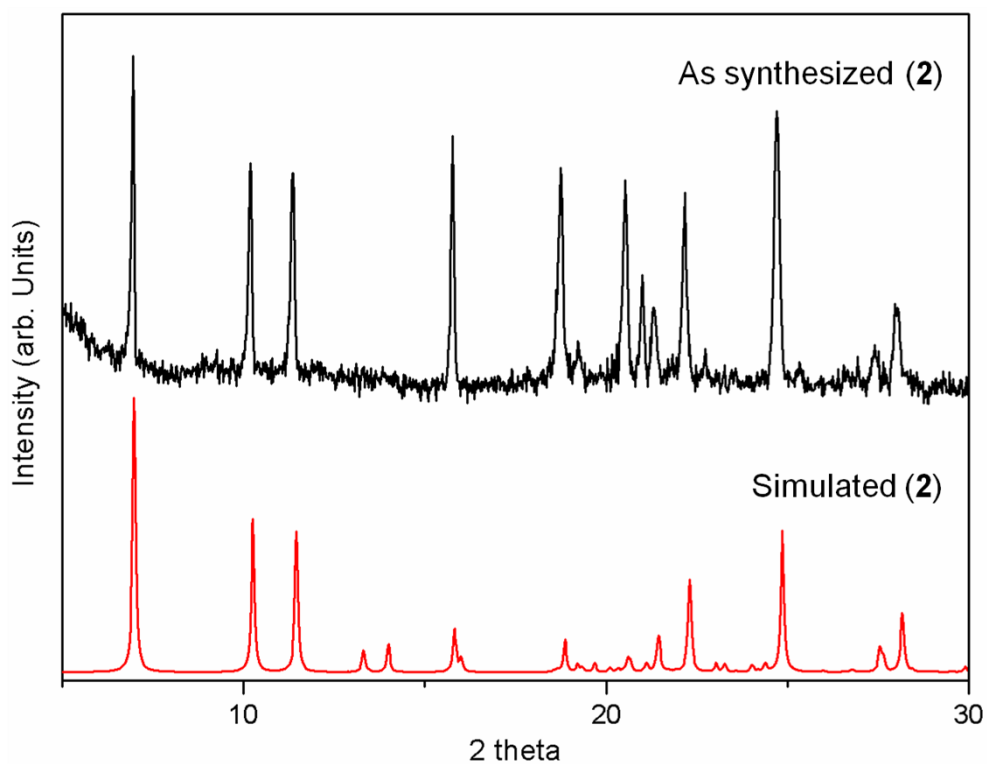

**Fig. S4** PXRD patterns for **2**: (top) as synthesized and (bottom) simulated from the single-crystal X-ray data.

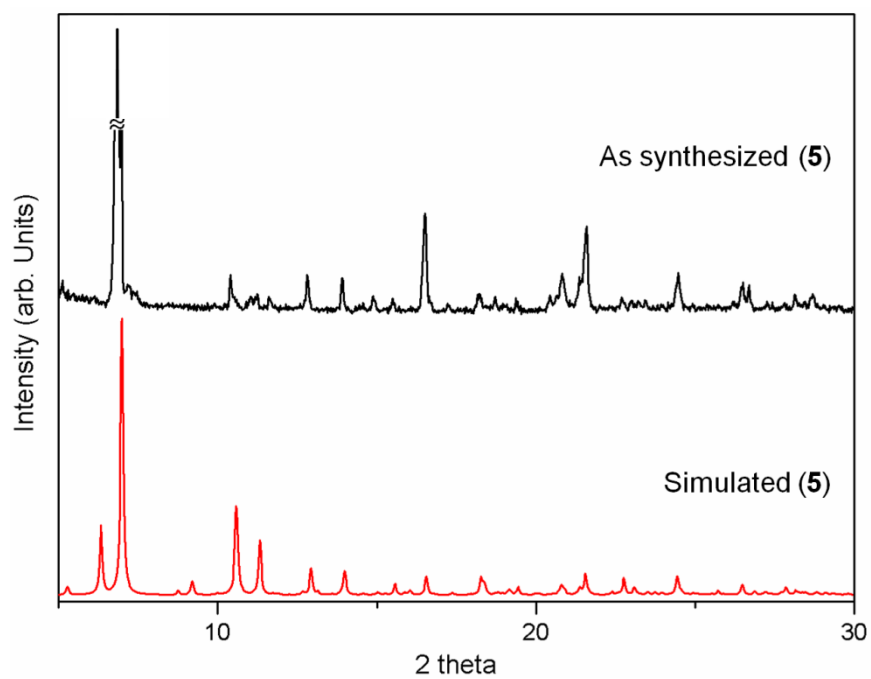

**Fig. S5** PXRD patterns for **5**: (top) as synthesized and (bottom) simulated from the single-crystal X-ray data.

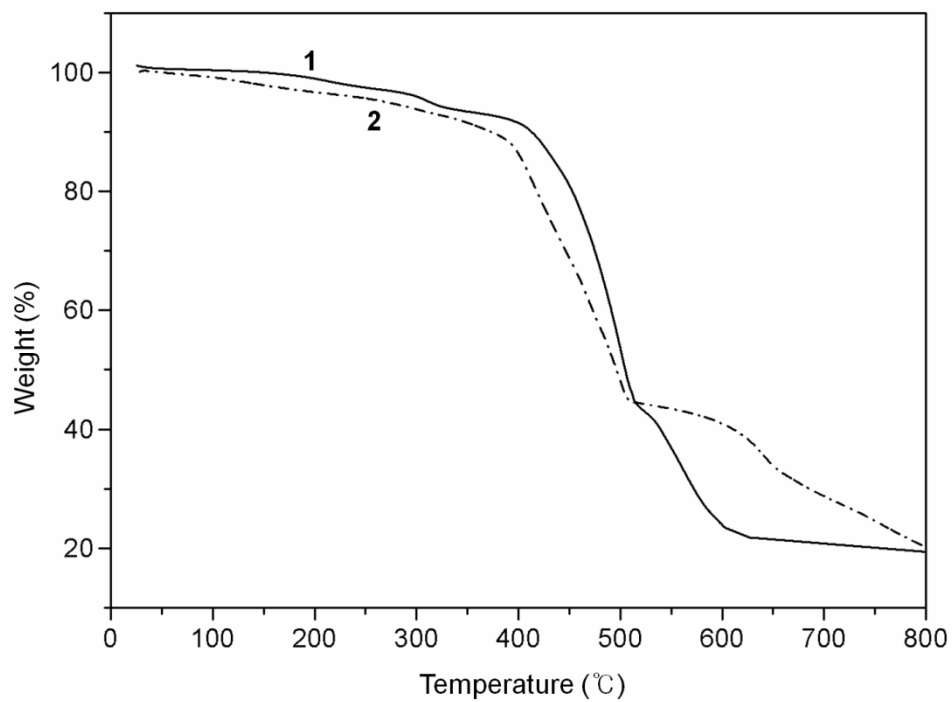

**Fig. S6** TGA curves for **1** and **2**.
